# Supplementary material for: Streptococcus thermophilus JM905—Strain Carbon Source Utilization and Its Fermented Milk Metabolic Profile at Different Fermentation Stages
Source: MDPI journal article supplement (doi:10.3390/foods12193690), 2023-10-08
Supplement: s1 [file s1]

**Table S1**Utilisation of carbon sources by *Streptococcus thermophilus* JM905

| Hole | Substrate                        | Numerical value | Difference (X-A1) | Utilisation+/<br>inhibition-degree | Hole | Substrate                   | Numerical value | Difference (X-A1) | Utilisation+/<br>inhibition-degree |
|------|----------------------------------|-----------------|-------------------|------------------------------------|------|-----------------------------|-----------------|-------------------|------------------------------------|
| A1   | Negative control                 | 35              | 0                 | /                                  | E1   | Gelatin                     | 51              | 16                | +                                  |
| A2   | Dextrin                          | 84              | 49                | +                                  | E2   | Glycl-L-Proline             | 38              | 3                 | +                                  |
| A3   | D-Maltose                        | 141             | 106               | +++                                | E3   | L-Alanine                   | 45              | 10                | +                                  |
| A4   | D-Trehalose                      | 226             | 191               | ++++                               | E4   | L-Arginine                  | 34              | -1                | -                                  |
| A5   | D-Cellulose                      | 226             | 191               | ++++                               | E5   | L-Aspartic Acid             | 44              | 9                 | +                                  |
| A6   | Gentiandiose                     | 236             | 201               | +++++                              | E6   | L-Glutamic Acid             | 44              | 9                 | +                                  |
| A7   | Sucrose                          | 93              | 58                | ++                                 | E7   | L-Histidine                 | 50              | 15                | +                                  |
| A8   | D-Turanose                       | 123             | 88                | ++                                 | E8   | L-Pyroglutamic Acid         | 39              | 4                 | +                                  |
| A9   | Stachyose                        | 37              | 2                 | +                                  | E9   | L-Serine                    | 42              | 7                 | +                                  |
| B1   | D-Raffinose                      | 45              | 10                | +                                  | F1   | Pectin                      | 47              | 12                | +                                  |
| B2   | $\alpha$ -D-Lactose              | 224             | 189               | ++++                               | F2   | D-Galacturonic Acid         | 68              | 33                | +                                  |
| B3   | Melibiose                        | 58              | 23                | +                                  | F3   | L-Galactonic Acid-g-Lactone | 82              | 47                | +                                  |
| B4   | $\beta$ --Methyl-D-Glucoside     | 232             | 197               | ++++                               | F4   | D-Gluconic Acid             | 225             | 190               | ++++                               |
| B5   | D-Salicin                        | 233             | 198               | ++++                               | F5   | D-Glucuronic Acid           | 83              | 48                | +                                  |
| B6   | N-Acetyl-D-Glucosamine           | 231             | 196               | ++++                               | F6   | D-Glucuronamide             | 152             | 117               | +++                                |
| B7   | N-Acetyl-D-Galactosamine         | 103             | 68                | ++                                 | F7   | Mucic Acid                  | 60              | 25                | +                                  |
| B8   | N-Acetyl- $\beta$ -Galactosamine | 233             | 198               | ++++                               | F8   | Quinic Acid                 | 37              | 2                 | +                                  |
| B9   | N-Acetyl-Neuraminic Acid         | 41              | 6                 | +                                  | F9   | Saccharic Acid              | 35              | 0                 | /                                  |
| C1   | $\alpha$ -D-Glucose              | 220             | 185               | ++++                               | G1   | Hydroxyphenyl Acetic Acid   | 49              | 14                | +                                  |
| C2   | D-Mannose                        | 217             | 182               | ++++                               | G2   | Pyruvic Acid methyl Ester   | 54              | 19                | +                                  |
| C3   | D-Fructose                       | 217             | 182               | ++++                               | G3   | D-Lactic Acid Methyl Ester  | 81              | 46                | +                                  |
| C4   | D-Galactose                      | 220             | 185               | ++++                               | G4   | L-Lactic Acid               | 167             | 132               | +++                                |
| C5   | 3-Methyl glucose                 | 51              | 16                | +                                  | G5   | Citric Acid                 | 42              | 7                 | +                                  |

|    |                        |     |     |      |    |                                   |     |     |      |
|----|------------------------|-----|-----|------|----|-----------------------------------|-----|-----|------|
| C6 | D-Fucose               | 89  | 54  | ++   | G6 | $\alpha$ -Ketoglutaric Acid       | 54  | 19  | +    |
| C7 | L-Fucose               | 68  | 33  | +    | G7 | D-Malic Acid                      | 42  | 7   | +    |
| C8 | L-Rhamnose             | 218 | 183 | ++++ | G8 | L-Malic Acid                      | 202 | 167 | ++++ |
| C9 | Inosine                | 68  | 33  | +    | G9 | Bromosuccinic Acid                | 93  | 58  | ++   |
| D1 | D-Sorbitol             | 209 | 174 | ++++ | H1 | Tween 40                          | 67  | 32  | +    |
| D2 | D-Mannitol             | 221 | 186 | ++++ | H2 | $\gamma$ -Amino-Butyric Acid      | 53  | 18  | +    |
| D3 | D-Arabitol             | 51  | 16  | +    | H3 | $\alpha$ -Hydroxy-Butyric Acid    | 187 | 152 | ++++ |
| D4 | Inositol               | 92  | 57  | ++   | H4 | $\beta$ -Hydroxy-D,L-Butyric Acid | 53  | 18  | +    |
| D5 | Glycerol               | 203 | 168 | ++++ | H5 | $\alpha$ -Keto-Butyric Acid       | 57  | 22  | +    |
| D6 | D-Glucose-6-Phosphate  | 67  | 32  | +    | H6 | Acetoacetic Acid                  | 97  | 62  | ++   |
| D7 | D-Fructose-6-Phosphate | 98  | 63  | ++   | H7 | Propionic Acid                    | 46  | 11  | +    |
| D8 | D-Aspartic Acid        | 37  | 2   | +    | H8 | Acetic Acid                       | 76  | 41  | +    |
| D9 | D-Serine               | 42  | 7   | +    | H9 | Formic Acid                       | 54  | 19  | +    |

Note: Carbon source utilisation test difference is the value of x-A1, i.e. substrate value per well - negative control value; degree of utilisation: 0-50 (+), 51-100 (++), 101-150 (+++), 151-200 (++++), 201-250 (+++++).
